# Supplementary material for: Antimicrobial Resistance and Genomic Epidemiology of tet(X4)-Bearing Bacteria of Pork Origin in Jiangsu, China
Source: MDPI journal article supplement (doi:10.3390/genes14010036), 2022-12-22
Supplement: s1 [file s1]

## Supplementary data

**Table S1 The primers for detecting different plasmid replicons.**

| Primers        | Sequences of 5'-3'    | Products<br>(bp) | Annealing<br>temperature | Extension<br>time |
|----------------|-----------------------|------------------|--------------------------|-------------------|
| IncHI2A<br>- F | GCTCGGGATCATCATGGCTT  | 175              | 52°C                     | 30 s              |
| IncHI2A<br>- R | TGAGAAGGCAAGCACTACCC  |                  |                          |                   |
| IncHI2 -<br>F  | AACACCCGGTTTCTACGCTT  | 218              | 53°C                     | 30 s              |
| IncHI2 -<br>R  | TAAGTTCCGGTGTCTCTCCCA |                  |                          |                   |
| IncX1 - F      | TGCCAGGGAGCGTAAGAAAC  | 177              | 51°C                     | 30 s              |
| IncX1 - R      | ATACCACCCAGCCAGAACAC  |                  |                          |                   |
| IncHI1B<br>- F | TTACCGTCGACGCGATACAG  | 162              | 52°C                     | 30 s              |
| IncHI1B<br>- R | AGCCCGGACCAACATTTTCAT |                  |                          |                   |
| IncFII - F     | CCGTAAGGTGGCAAGGAACT  | 111              | 52°C                     | 30 s              |
| IncFII - R     | TGGGCCCCGGTAATCTTTTC  |                  |                          |                   |

**Table S2 Antimicrobial susceptibility testing (MICs, mg/L) of 23 *tet(X4)*-positive strains.**

| Strain ID    | Species              | Transconj<br>ugant | MLST | Plasmid replicon type           | Antimicrobials <sup>a</sup> |       |      |      |       |      |       |     |      |
|--------------|----------------------|--------------------|------|---------------------------------|-----------------------------|-------|------|------|-------|------|-------|-----|------|
|              |                      |                    |      |                                 | MEM                         | CIP   | CHL  | FFC  | COL   | STR  | CFP   | TIG | TET  |
| X587-2-1-R   | <i>E.coli</i>        | -                  | -    | IncHI1B, IncFII, IncX1, IncHI2A | <0.25                       | <0.25 | 128  | >128 | <0.25 | >128 | 0.5   | 16  | >128 |
| X581-1-1     | <i>E.coli</i>        | +                  | -    | IncX1, IncHI2A                  | <0.25                       | <0.25 | 128  | >128 | <0.25 | 128  | >128  | 64  | >128 |
| X581-3-1     | <i>E.coli</i>        | -                  | -    | IncX1, IncHI2A                  | <0.25                       | 1     | 128  | 128  | <0.25 | >128 | 1     | 128 | >128 |
| X589-1-1     | <i>E.coli</i>        | -                  | -    | IncX1, IncHI2A                  | <0.25                       | 1     | 128  | >128 | <0.25 | >128 | 64    | 32  | >128 |
| X615-1       | <i>E.coli</i>        | +                  | -    | IncX1, IncHI2A                  | <0.25                       | <0.25 | 128  | >128 | <0.25 | 64   | >128  | 64  | >128 |
| L586-3-1     | <i>E.coli</i>        | +                  | -    | IncX1, IncHI2A                  | <0.25                       | <0.25 | >128 | >128 | <0.25 | >128 | 128   | 64  | >128 |
| X572-2-1-1   | <i>E.coli</i>        | -                  | -    | IncX1, IncHI2A                  | <0.25                       | <0.25 | >128 | 128  | <0.25 | 64   | 64    | 128 | >128 |
| X572-2-2     | <i>E.coli</i>        | +                  | -    | IncX1, IncHI2A                  | <0.25                       | <0.25 | 128  | 128  | <0.25 | >128 | >128  | 32  | >128 |
| XX591-1      | <i>E.coli</i>        | +                  | -    | IncX1, IncHI2A                  | <0.25                       | <0.25 | >128 | >128 | <0.25 | >128 | <0.25 | 32  | >128 |
| X587-2-2-1-R | <i>E.coli</i>        | -                  | -    | IncHI1B, IncFII, IncX1, IncHI2A | <0.25                       | <0.25 | 128  | 128  | <0.25 | >128 | 0.5   | 32  | 128  |
| X607-2-1     | <i>E.coli</i>        | -                  | -    | IncX1, IncHI2A                  | <0.25                       | <0.25 | 64   | 128  | <0.25 | >128 | <0.25 | 16  | >128 |
| X574-2-1-2   | <i>E.coli</i>        | +                  | -    | IncX1, IncHI2A                  | <0.25                       | <0.25 | 128  | >128 | <0.25 | 64   | >128  | 32  | >128 |
| L578-3-1     | <i>E.coli</i>        | +                  | 2728 | IncHI1B, IncHI2A                | <0.25                       | <0.25 | 128  | >128 | <0.25 | >128 | 0.5   | 32  | >128 |
| X594-2-1-2   | <i>E.coli</i>        | +                  | -    | IncHI1B, IncFII, IncX1, IncHI2A | <0.25                       | <0.25 | 128  | >128 | <0.25 | >128 | >128  | 64  | >128 |
| X572-3-1     | <i>E.coli</i>        | +                  | -    | IncX1, IncHI2A                  | <0.25                       | <0.25 | 128  | >128 | <0.25 | >128 | >128  | 64  | >128 |
| Lx600-2      | <i>E.coli</i>        | -                  | 2064 | IncHI1B, IncX1, IncHI2A         | <0.25                       | 4     | >128 | >128 | 0.5   | 8    | 2     | 128 | >128 |
| L584-2-1     | <i>E.coli</i>        | +                  | 1725 | IncHI1B, IncHI2, IncX1, IncHI2A | <0.25                       | <0.25 | 128  | >128 | <0.25 | >128 | 0.5   | 128 | >128 |
| X591-3       | <i>E.coli</i>        | -                  | -    | IncHI1B, IncX1, IncHI2A         | <0.25                       | <0.25 | 128  | >128 | <0.25 | >128 | <0.25 | 64  | >128 |
| X573-1       | <i>E.coli</i>        | -                  | -    | IncHI1B, IncFII, IncHI2A        | <0.25                       | 2     | 128  | >128 | <0.25 | >128 | <0.25 | 16  | >128 |
| X591-3-1-R   | <i>E.coli</i>        | +                  | -    | IncHI1B, IncX1, IncHI2A         | <0.25                       | 4     | >128 | >128 | <0.25 | >128 | 64    | 32  | >128 |
| X594-2-1-1   | <i>E.coli</i>        | +                  | -    | IncHI1B, IncX1, IncHI2A         | <0.25                       | <0.25 | 64   | 128  | <0.25 | >128 | <0.25 | 16  | >128 |
| L614-1       | <i>E.coli</i>        | +                  | -    | IncX1, IncHI2A                  | <0.25                       | <0.25 | >128 | >128 | <0.25 | >128 | 64    | 32  | >128 |
| X585-1       | <i>K. pneumoniae</i> | +                  | 2601 | IncFII                          | <0.25                       | >128  | >128 | >128 | <0.25 | >128 | >128  | 8   | 64   |

<sup>a</sup> Abbreviations: MEM, meropenem; CIP, Ciprofloxacin; CHL, Chloramphenicol; FFC, florfenicol; COL, Colistin; STR, Streptomycin; CFP, Cefoperazone; TIG, tigecycline; TET, tetracycline.

**Table S3 Plasmid replicons of transconjugants.**

| Transconjugant ID | Plasmid replicon type   |
|-------------------|-------------------------|
| CL572-3-1         | IncX1                   |
| CL578-3-1         | IncHI2                  |
| CX574-2-1-2       | IncX1                   |
| CX585-1-1         | IncFII                  |
| CX591-1           | IncHI2A, IncX1          |
| CL584-2-1         | IncHI2A, IncX1          |
| CX614-1           | IncHI2A, IncX1          |
| CX591-3-1-R       | IncHI1B, IncHI2A        |
| CX615-1           | IncHI2A, IncX1          |
| CX594-2-1-2       | IncHI1B, IncHI2A, IncX1 |
| CX586-3-1         | IncHI2A, IncX1          |
| CX572-2-2         | IncHI2                  |
| CX594-2-1-1       | IncHI1B, IncHI2A, IncX1 |
| CX581-1-1         | IncX1                   |

**Table S4 Basic information of 117 *tet*(X4)-positive *E. coli* collected from the NCBI database.**

| Strain | Isolation type      | Isolation source | BioSample    | Assembly        |
|--------|---------------------|------------------|--------------|-----------------|
| S555-1 | clinical            | Homo sapiens     | SAMN19575535 | GCA_019879125.1 |
| S909-1 | clinical            | Homo sapiens     | SAMN19575546 | GCA_019879155.1 |
| S985   | clinical            | Homo sapiens     | SAMN19575549 | GCA_019879205.1 |
| S959   | clinical            | Homo sapiens     | SAMN19575548 | GCA_019879145.1 |
| S557   | clinical            | Homo sapiens     | SAMN19575536 | GCA_019879245.1 |
| S752   | clinical            | Homo sapiens     | SAMN19575542 | GCA_019879265.1 |
| S934   | clinical            | Homo sapiens     | SAMN19575547 | GCA_019879285.1 |
| S698-1 | clinical            | Homo sapiens     | SAMN19575540 | GCA_019879295.1 |
| S542-2 | clinical            | Homo sapiens     | SAMN19575533 | GCA_019879345.1 |
| S540-1 | clinical            | Homo sapiens     | SAMN19575531 | GCA_019879385.1 |
| S518-1 | clinical            | Homo sapiens     | SAMN19575530 | GCA_019879405.1 |
| S502-1 | clinical            | Homo sapiens     | SAMN19575529 | GCA_019879445.1 |
| S455   | clinical            | Homo sapiens     | SAMN19575525 | GCA_019879485.1 |
| S424-2 | clinical            | Homo sapiens     | SAMN19575524 | GCA_019879495.1 |
| S383   | clinical            | Homo sapiens     | SAMN19575522 | GCA_019879525.1 |
| S408-1 | clinical            | Homo sapiens     | SAMN19575523 | GCA_019879545.1 |
| S364   | clinical            | Homo sapiens     | SAMN19575521 | GCA_019879535.1 |
| S187-1 | clinical            | Homo sapiens     | SAMN19575512 | GCA_019879585.1 |
| S314-1 | clinical            | Homo sapiens     | SAMN19575519 | GCA_019879605.1 |
| S121-6 | clinical            | Homo sapiens     | SAMN19575506 | GCA_019879625.1 |
| S274-2 | clinical            | Homo sapiens     | SAMN19575518 | GCA_019879645.1 |
| S251-1 | clinical            | Homo sapiens     | SAMN19575517 | GCA_019879705.1 |
| S221-6 | clinical            | Homo sapiens     | SAMN19575515 | GCA_019879735.1 |
| S186-6 | clinical            | Homo sapiens     | SAMN19575511 | GCA_019879765.1 |
| S180-1 | clinical            | Homo sapiens     | SAMN19575510 | GCA_019879785.1 |
| S138   | clinical            | Homo sapiens     | SAMN19575508 | GCA_019879805.1 |
| S107-2 | clinical            | Homo sapiens     | SAMN19575504 | GCA_019879845.1 |
| S568-2 | clinical            | Homo sapiens     | SAMN19575538 | GCA_019879945.1 |
| S35-1  | clinical            | Homo sapiens     | SAMN19575520 | GCA_019879965.1 |
| S568-1 | clinical            | Homo sapiens     | SAMN19575537 | GCA_019879955.1 |
| S855-1 | clinical            | Homo sapiens     | SAMN19575544 | GCA_019880005.1 |
| R133-2 | clinical            | Homo sapiens     | SAMN19575502 | GCA_019880045.1 |
| S90-6  | clinical            | Homo sapiens     | SAMN19575545 | GCA_019880065.1 |
| R136-3 | clinical            | Homo sapiens     | SAMN19575503 | GCA_019880095.1 |
| S847-1 | clinical            | Homo sapiens     | SAMN19575543 | GCA_019879885.1 |
| S472   | clinical            | Homo sapiens     | SAMN19575527 | GCA_019879925.1 |
| S110-1 | clinical            | Homo sapiens     | SAMN19575505 | GCA_019879685.1 |
| S647   | clinical            | Homo sapiens     | SAMN19575539 | GCA_019879905.1 |
| S544   | clinical            | Homo sapiens     | SAMN19575534 | GCA_019879225.1 |
| S542   | clinical            | Homo sapiens     | SAMN19575532 | GCA_019879365.1 |
| S221-2 | clinical            | Homo sapiens     | SAMN19575514 | GCA_019879635.1 |
| S209-1 | clinical            | Homo sapiens     | SAMN19575513 | GCA_019879465.1 |
| S229-2 | clinical            | Homo sapiens     | SAMN19575516 | GCA_019879725.1 |
| S490-1 | clinical            | Homo sapiens     | SAMN19575528 | GCA_019879325.1 |
| S468   | clinical            | Homo sapiens     | SAMN19575526 | GCA_019879425.1 |
| S161-1 | clinical            | Homo sapiens     | SAMN19575509 | GCA_019879825.1 |
| S130-6 | clinical            | Homo sapiens     | SAMN19575507 | GCA_019879855.1 |
| S71-6  | clinical            | Homo sapiens     | SAMN19575541 | GCA_019880025.1 |
| YPE10  | environmental/other | pork             | SAMN12233488 | GCA_008807135.1 |
| SZ12R  | environmental/other | pork             | SAMN16274518 | GCA_015730745.1 |
| SZ11R  | environmental/other | pork             | SAMN16274517 | GCA_015730755.1 |
| SX5G   | environmental/other | pork             | SAMN16274514 | GCA_015730805.1 |
| SX8G   | environmental/other | pork             | SAMN16274515 | GCA_015730815.1 |
| SZ10R  | environmental/other | pork             | SAMN16274516 | GCA_015730825.1 |
| SX3G   | environmental/other | pork             | SAMN16274513 | GCA_015730835.1 |
| SX2G   | environmental/other | pork             | SAMN16274512 | GCA_015730885.1 |
| SH6R   | environmental/other | pork             | SAMN16274507 | GCA_015730925.1 |
| SX13G  | environmental/other | pork             | SAMN16274510 | GCA_015730935.1 |
| SX1G   | environmental/other | pork             | SAMN16274511 | GCA_015730955.1 |
| SX11G  | environmental/other | pork             | SAMN16274509 | GCA_015730945.1 |
| SH11R  | environmental/other | pork             | SAMN16274503 | GCA_015731015.1 |
| SDP2R  | environmental/other | pork             | SAMN16274501 | GCA_015731105.1 |
| HS2-1  | environmental/other | pork             | SAMN16274494 | GCA_015731245.1 |
| HS17-1 | environmental/other | pork             | SAMN16274490 | GCA_015731305.1 |
| HS16-1 | environmental/other | pork             | SAMN16274489 | GCA_015731345.1 |

|            |                     |      |              |                 |
|------------|---------------------|------|--------------|-----------------|
| HS12-1     | environmental/other | pork | SAMN16274485 | GCA_015731365.1 |
| HS13-1     | environmental/other | pork | SAMN16274486 | GCA_015731415.1 |
| HN13R      | environmental/other | pork | SAMN16274480 | GCA_015731515.1 |
| HN16R      | environmental/other | pork | SAMN16274481 | GCA_015731505.1 |
| AB4-2      | environmental/other | pork | SAMN16274476 | GCA_015731595.1 |
| AB12-1     | environmental/other | pork | SAMN16274472 | GCA_015731705.1 |
| 2GS3       | environmental/other | pork | SAMN16274470 | GCA_015731725.1 |
| ST20192942 | environmental/other | pork | SAMN14119817 | GCA_018295865.1 |
| SRS6162984 | environmental/other | pork | SAMN14119815 | GCA_018295825.1 |
| ST20192741 | environmental/other | pork | SAMN14119813 | GCA_018295765.1 |
| ST20192836 | environmental/other | pork | SAMN14119830 | GCA_018295605.1 |
| ST20192677 | environmental/other | pork | SAMN14119829 | GCA_018295625.1 |
| ST20192631 | environmental/other | pork | SAMN14119810 | GCA_018295645.1 |
| ST20193129 | environmental/other | pork | SAMN14119828 | GCA_018295585.1 |
| SRS6162972 | environmental/other | pork | SAMN14119827 | GCA_018295505.1 |
| ST20192618 | environmental/other | pork | SAMN14119809 | GCA_018295385.1 |
| ST20192610 | environmental/other | pork | SAMN14119797 | GCA_018295325.1 |
| YPE12      | environmental/other | Pork | SAMN12233489 | GCA_008807155.1 |
| YPE3       | environmental/other | Pork | SAMN12233487 | GCA_008807295.1 |
| SZ5R       | environmental/other | pork | SAMN16274523 | GCA_015730615.1 |
| SH9W       | environmental/other | pork | SAMN16274508 | GCA_015730905.1 |
| SH3W       | environmental/other | pork | SAMN16274506 | GCA_015731045.1 |
| HS18-1     | environmental/other | pork | SAMN16274491 | GCA_015731265.1 |
| ST20193088 | environmental/other | pork | SAMN14119826 | GCA_018295565.1 |
| SZ7R       | environmental/other | pork | SAMN16274525 | GCA_015730605.1 |
| HN18R      | environmental/other | pork | SAMN16274483 | GCA_015731455.1 |
| HN17R      | environmental/other | pork | SAMN16274482 | GCA_015731485.1 |
| HN10R      | environmental/other | pork | SAMN16274479 | GCA_015731545.1 |
| AB5-1      | environmental/other | pork | SAMN16274478 | GCA_015731555.1 |
| ZQ3-1      | environmental/other | pork | SAMN16274527 | GCA_015730585.1 |
| HS9-1      | environmental/other | pork | SAMN16274499 | GCA_015731145.1 |
| HS3-1      | environmental/other | pork | SAMN16274495 | GCA_015731165.1 |
| HS6-1      | environmental/other | pork | SAMN16274498 | GCA_015731185.1 |
| SZ12W      | environmental/other | pork | SAMN16274519 | GCA_015730705.1 |
| AB3-1-R    | environmental/other | pork | SAMN16274475 | GCA_015731625.1 |
| AB3-1-1    | environmental/other | pork | SAMN16274474 | GCA_015731645.1 |
| AB1-1-1    | environmental/other | pork | SAMN16274471 | GCA_015731685.1 |
| HS15-1     | environmental/other | pork | SAMN16274487 | GCA_015731405.1 |
| HS10-1     | environmental/other | pork | SAMN16274484 | GCA_015731445.1 |
| AB12-3     | environmental/other | pork | SAMN16274473 | GCA_015731655.1 |
| SZ9R       | environmental/other | pork | SAMN16274526 | GCA_015730625.1 |
| SZ3R       | environmental/other | pork | SAMN16274522 | GCA_015730685.1 |
| SZ1R       | environmental/other | pork | SAMN16274520 | GCA_015730725.1 |
| SZ2R       | environmental/other | pork | SAMN16274521 | GCA_015730715.1 |
| HS5-1      | environmental/other | pork | SAMN16274497 | GCA_015731195.1 |
| HS19-1     | environmental/other | pork | SAMN16274492 | GCA_015731315.1 |
| SH13R      | environmental/other | pork | SAMN16274505 | GCA_015731005.1 |
| SH12R      | environmental/other | pork | SAMN16274504 | GCA_015731065.1 |
| HS4-1      | environmental/other | pork | SAMN16274496 | GCA_015731225.1 |
| HS15-2     | environmental/other | pork | SAMN16274488 | GCA_015731385.1 |
| SRS6162985 | environmental/other | pork | SAMN14119816 | GCA_018295805.1 |
| SRS6162983 | environmental/other | pork | SAMN14119814 | GCA_018295785.1 |

**Table S5. Basic information of 22 *tet(X)*-positive *K. pneumoniae* genomes collected from the NCBI database.**

| Strain         | Location           | Isolation source           | Isolation type      | Host              | BioSample    | Assembly No.    |
|----------------|--------------------|----------------------------|---------------------|-------------------|--------------|-----------------|
| MRSN581745     | Thailand           | urine                      | clinical            | Homo sapiens      | SAMN18874753 | GCA_019927805.1 |
| Microbial      | Thailand: Chonburi | urine                      | clinical            | Homo sapiens      | SAMN28592075 | GCA_023778315.1 |
| 2016CRE_8      | Singapore          | Intermediate-Care Facility | clinical            | Homo sapiens      | SAMN16824633 | GCA_022026825.1 |
| 2016CRE_7      | Singapore          | Intermediate-Care Facility | clinical            | Homo sapiens      | SAMN16824632 | GCA_022026775.1 |
| K-1L           | China:Guangxi      | NA                         | NA                  | swine             | SAMN18487815 | GCA_020023465.1 |
| b1-2L          | China:Guangxi      | NA                         | NA                  | swine             | SAMN18487814 | GCA_020172745.1 |
| AUSMDU00041478 | Australia          | feces                      | clinical            | Homo sapiens      | SAMN20033638 | GCA_021933115.1 |
| SDP9R          | China              | pork                       | environmental/other | pork              | SAMN16274502 | GCA_015731075.1 |
| AB4-4          | China              | pork                       | environmental/other | pork              | SAMN16274477 | GCA_015731585.1 |
| 210-ESBLB      | Singapore          | rectal swab                | clinical            | Homo sapiens      | SAMN09460085 | GCA_022355205.1 |
| T877           | China:Guangdong    | NA                         | clinical            | Homo sapiens      | SAMN21849140 | GCA_022577075.1 |
| GD21SC417      | China:Guangdong    | NA                         | NA                  | bacteria          | SAMN23799605 | GCA_023650835.1 |
| S.15.20.Kp     | Germany            | hospital                   | clinical            | Homo sapiens      | SAMEA8218291 | GCA_021821245.1 |
| TQ11           | China              | fresh feces                | NA                  | swine             | SAMN27625142 | GCA_025175085.1 |
| TQ30           | China              | fresh feces                | NA                  | swine             | SAMN27625141 | GCA_025175775.1 |
| JZ18           | China              | fresh feces                | NA                  | swine             | SAMN27625117 | GCA_025176665.1 |
| JZ47           | China              | fresh feces                | NA                  | swine             | SAMN27625115 | GCA_025176705.1 |
| EC3266         | Singapore          | wound                      | clinical            | Homo sapiens      | SAMN17981844 | GCA_025095235.1 |
| EC1807         | Singapore          | URINARY                    | clinical            | Homo sapiens      | SAMN17981743 | GCA_025102265.1 |
| GD21SC1725T    | China:Guangdong    | vegetable                  | NA                  | Cantonese cabbage | SAMN31416123 | GCA_025909935.1 |
| YZ-58          | China              | pork                       | environmental/other | pork              | SAMN28157411 | GCA_025908435.1 |
| KPSW+02        | Thailand: Lamphun  | Rectal swab                | clinical            | Swine             | SAMN07450639 | GCA_002247645.1 |

NA, not available.
